# Supplementary material for: Bioactive Metabolites of Marine Origin Have Unusual Effects on Model Membrane Systems
Source: MDPI journal article supplement (doi:10.3390/md18020125), 2020-02-19
Supplement: s1 [file s1]

## Supplementary Information

For: Jakubec *et al.*, Small additions of bioactive marine sponge metabolites have unusual effects on lipid headgroup mobility and phase organization in membrane model systems

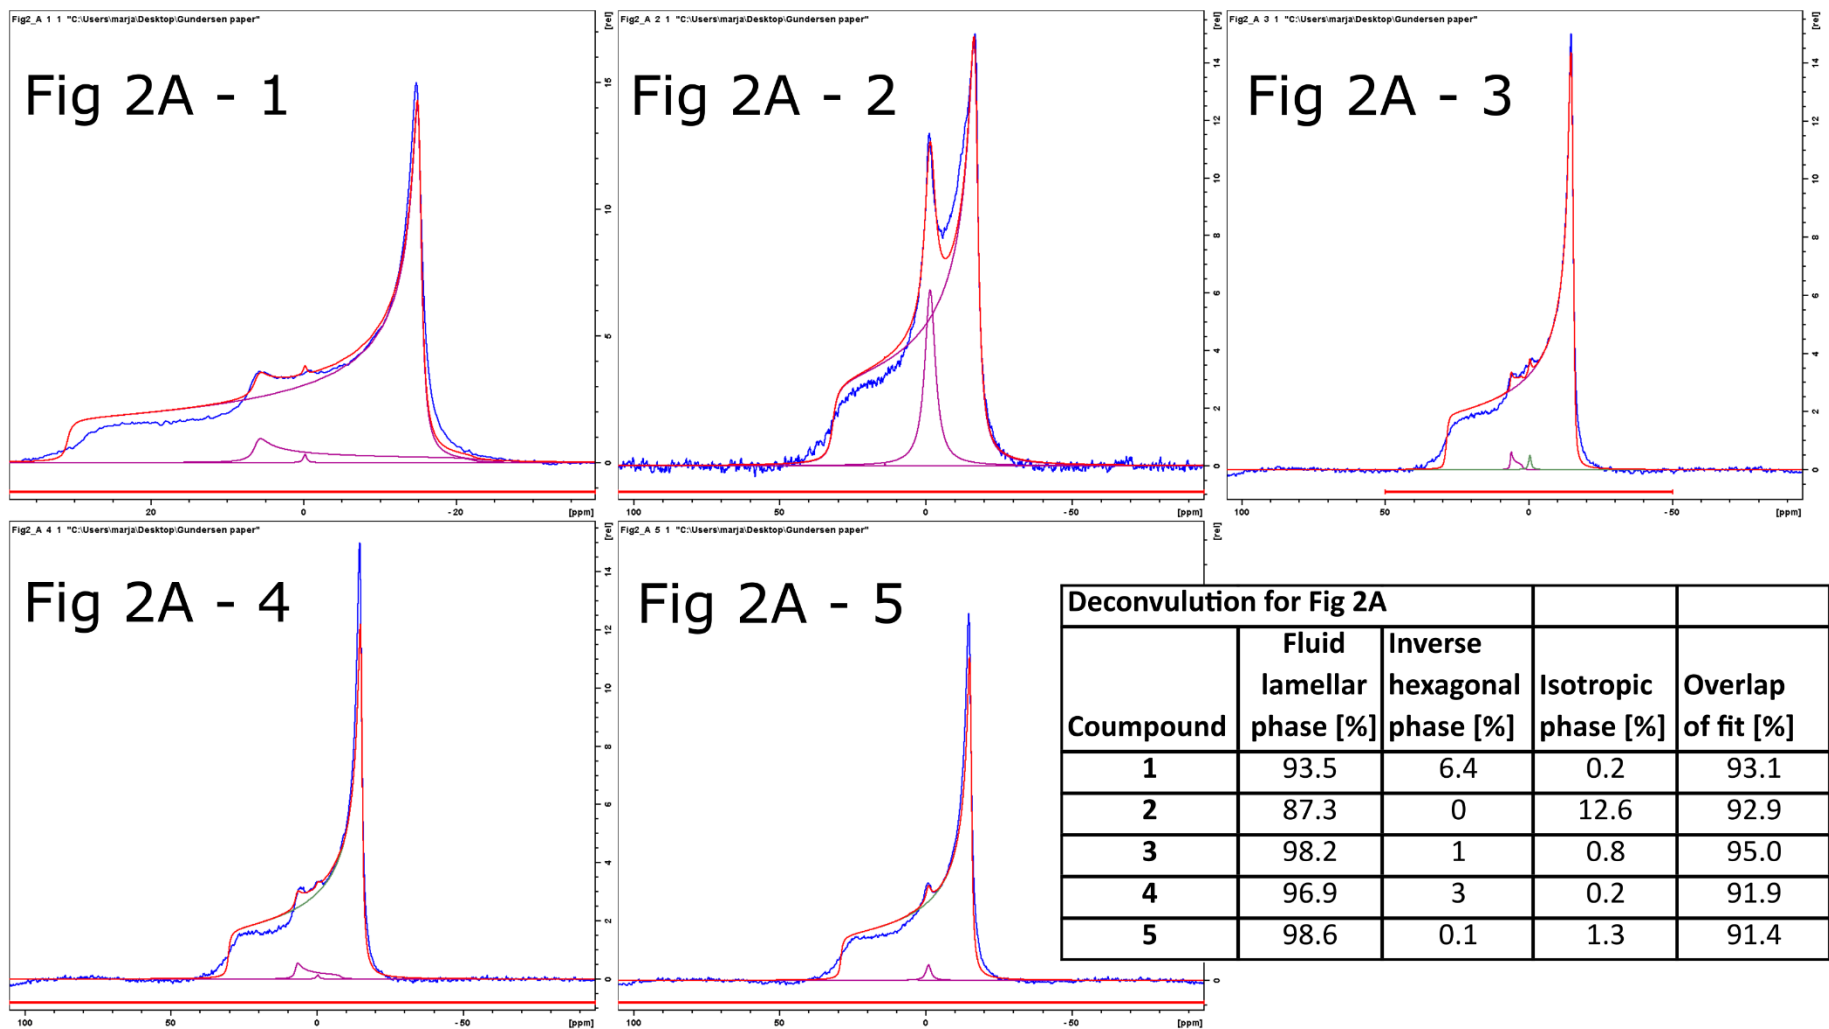

Fig. S1. Deconvoluted wide line  $^{31}\text{P}$  NMR scans for Fig 3A.

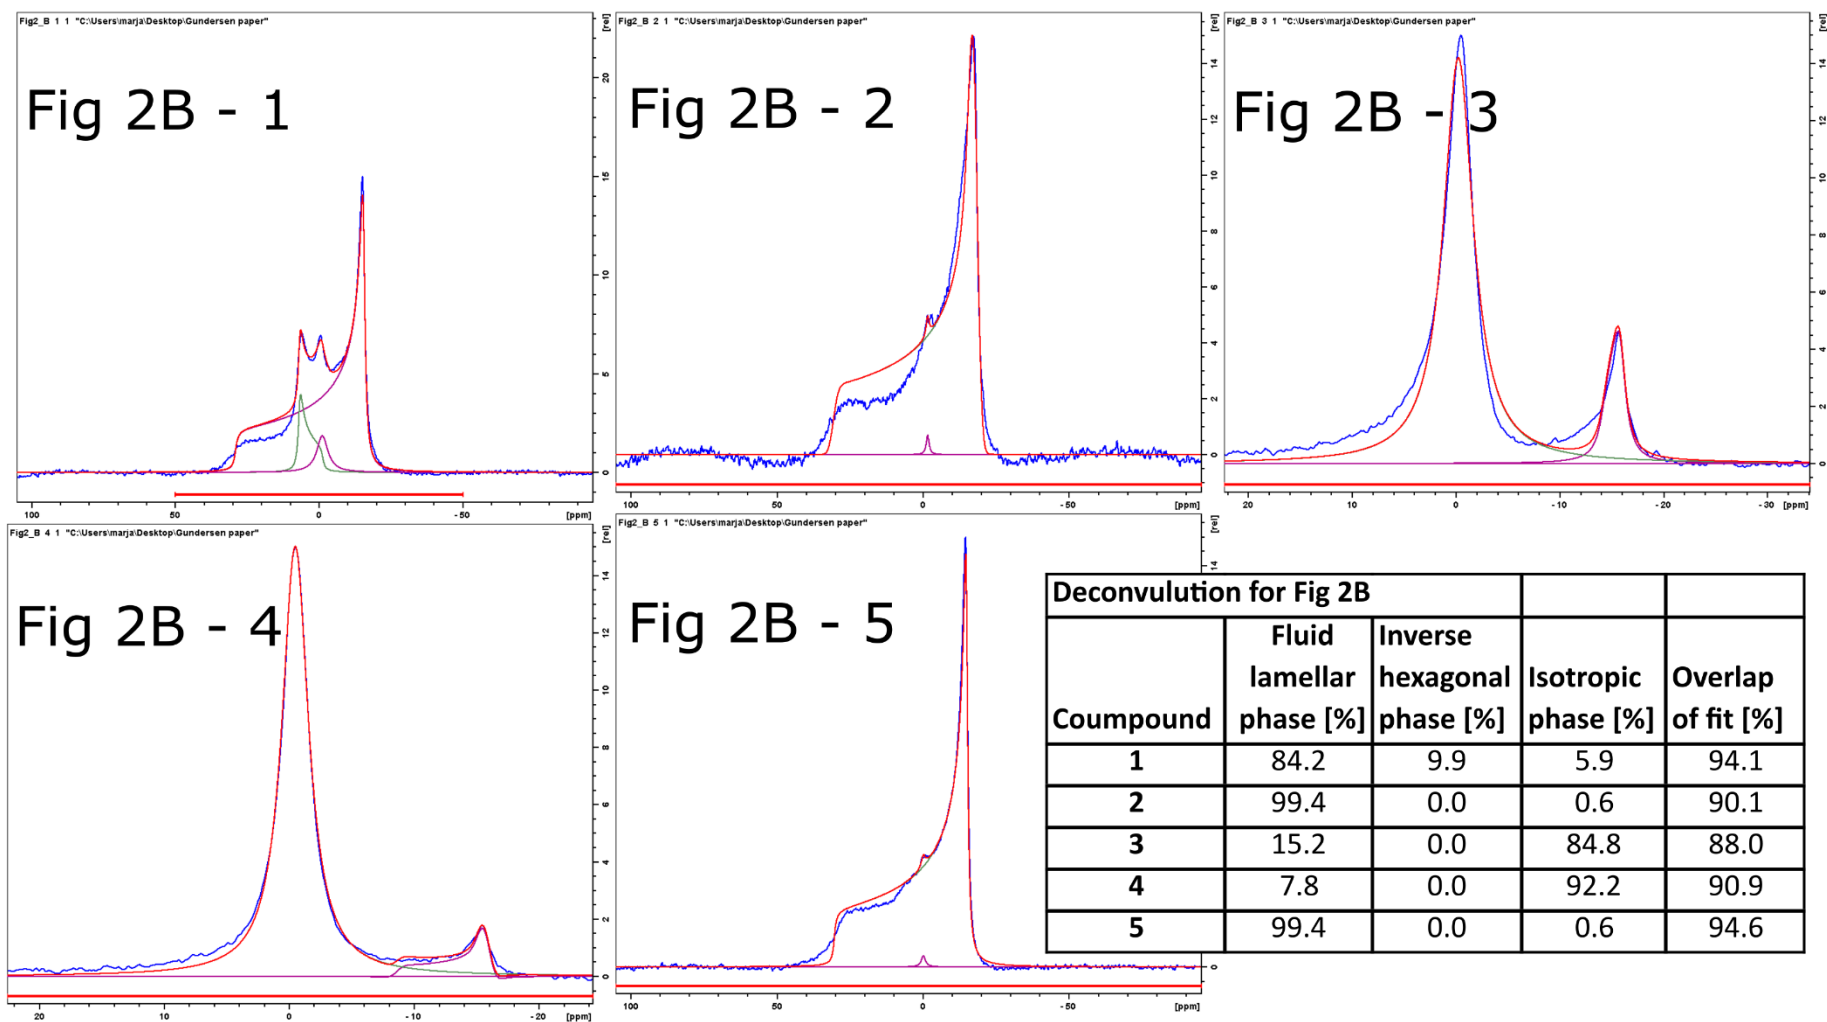

Fig. S2. Deconvoluted wide line  $^{31}\text{P}$  NMR scans for Fig 3B.

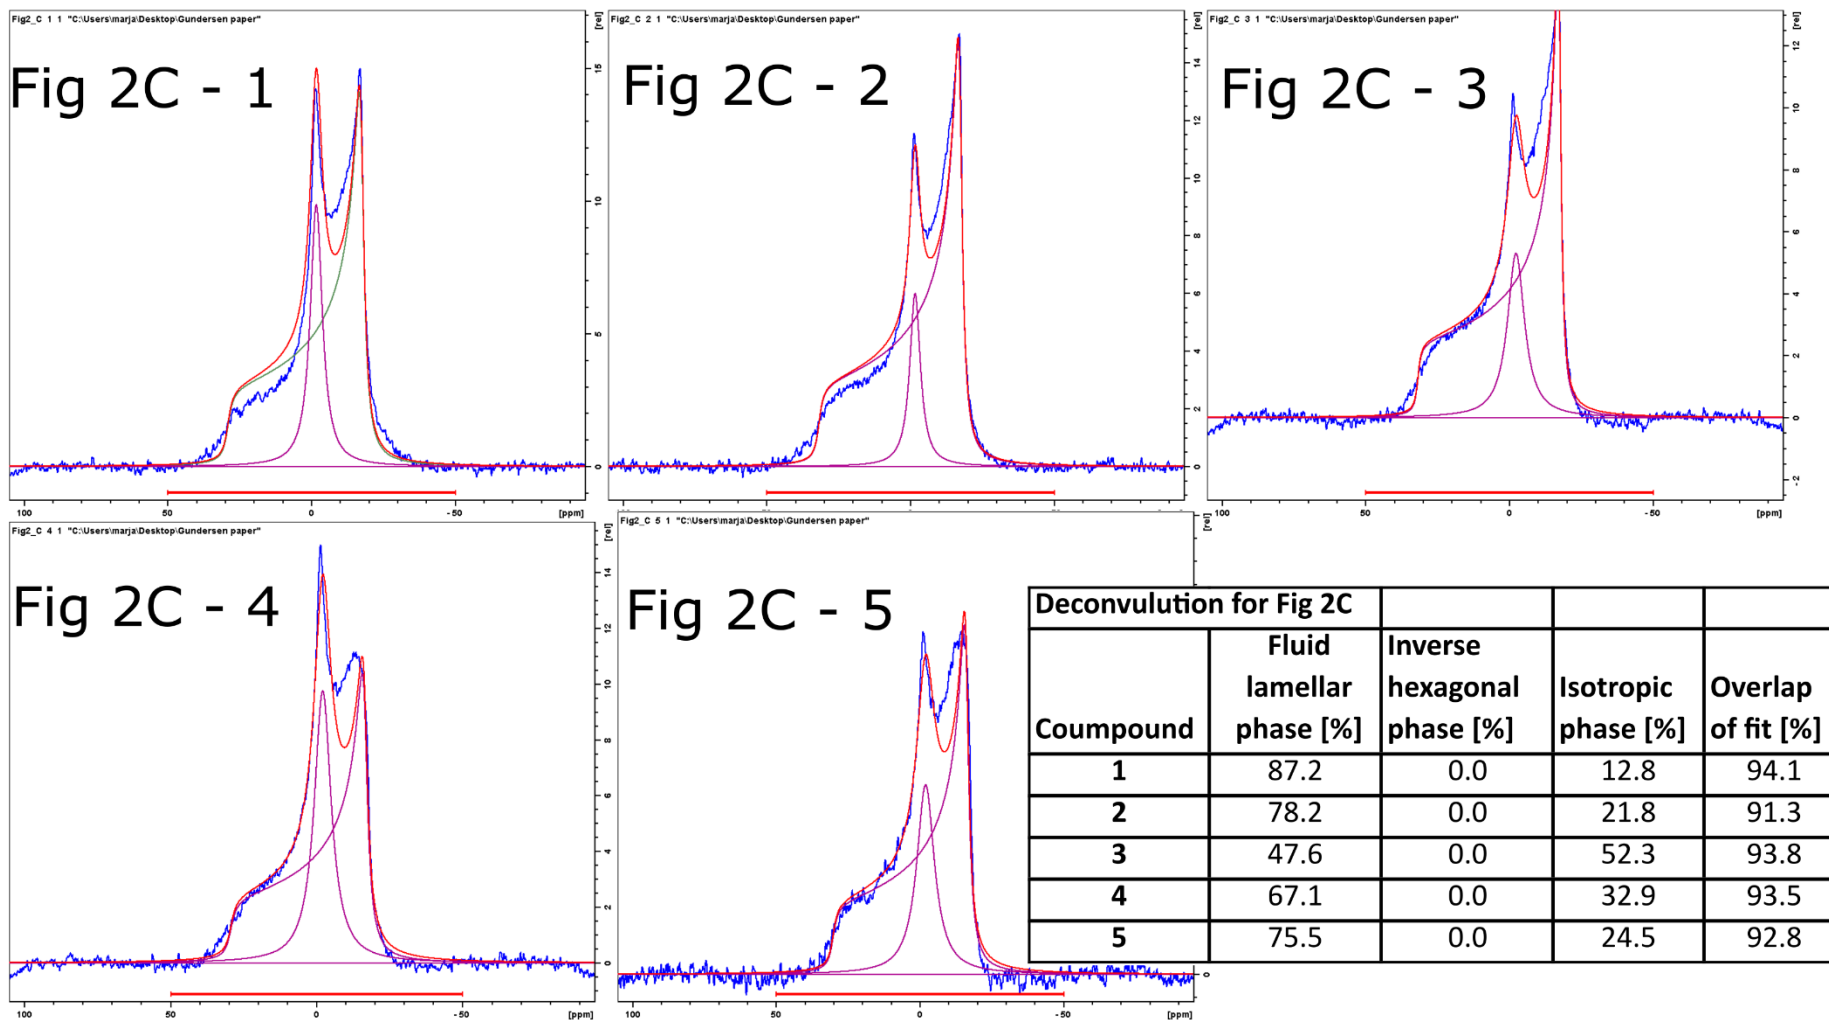

Fig. S3. Deconvoluted wide line  $^{31}\text{P}$  NMR scans for Fig 3C.

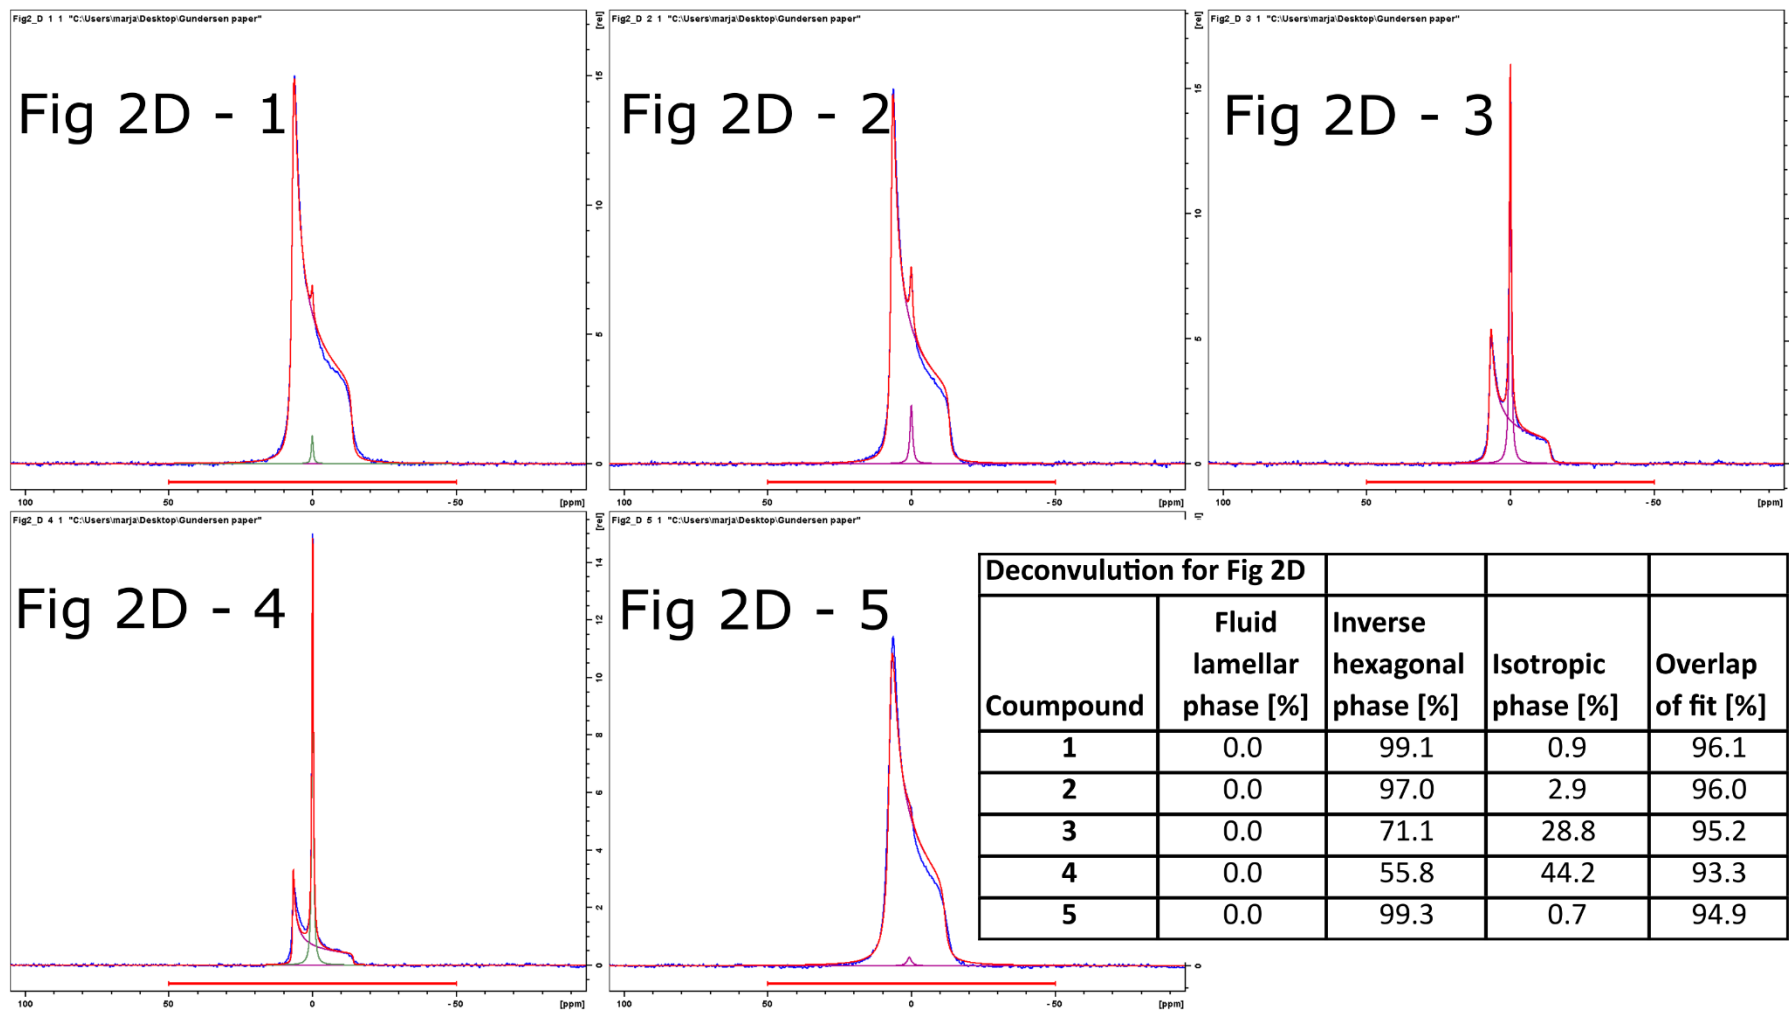

Fig. S4. Deconvoluted wide line  $^{31}\text{P}$  NMR scans for Fig 3D.

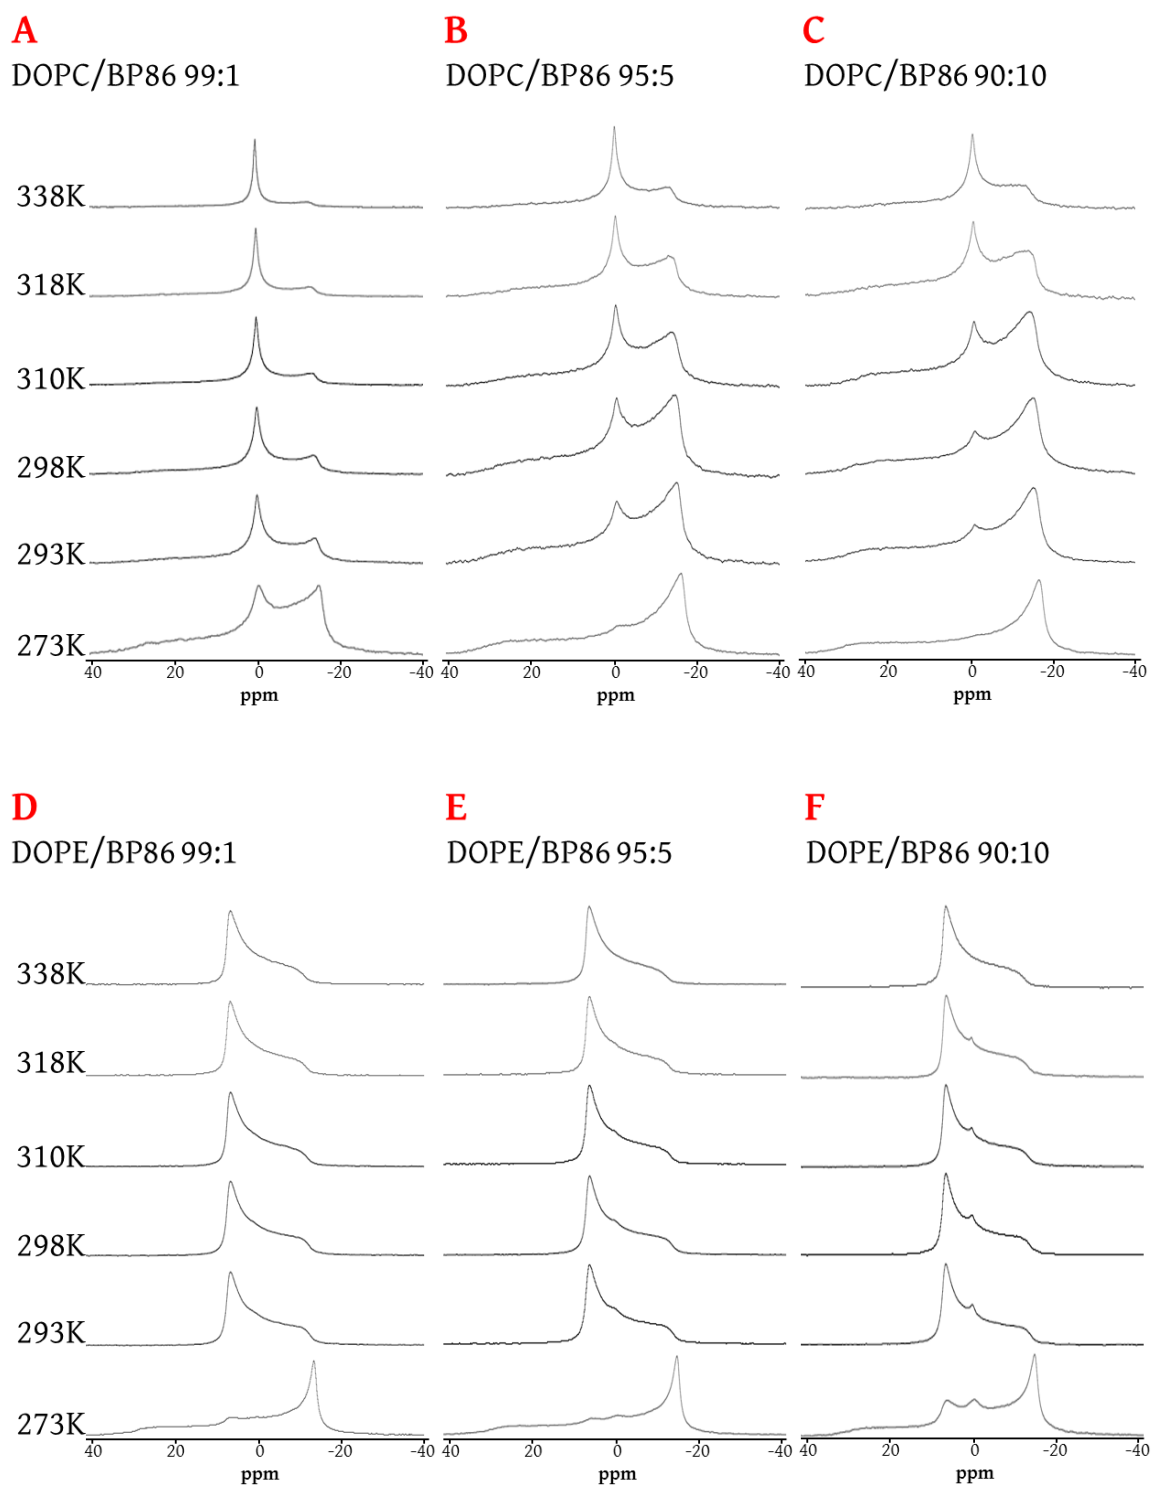

Fig. S5. Wide line  $^{31}\text{P}$  NMR temperature scans of DOPC (Panels A-C) and DOPE (panels D-F) doped with compound **1** (BP86; 1-10%).

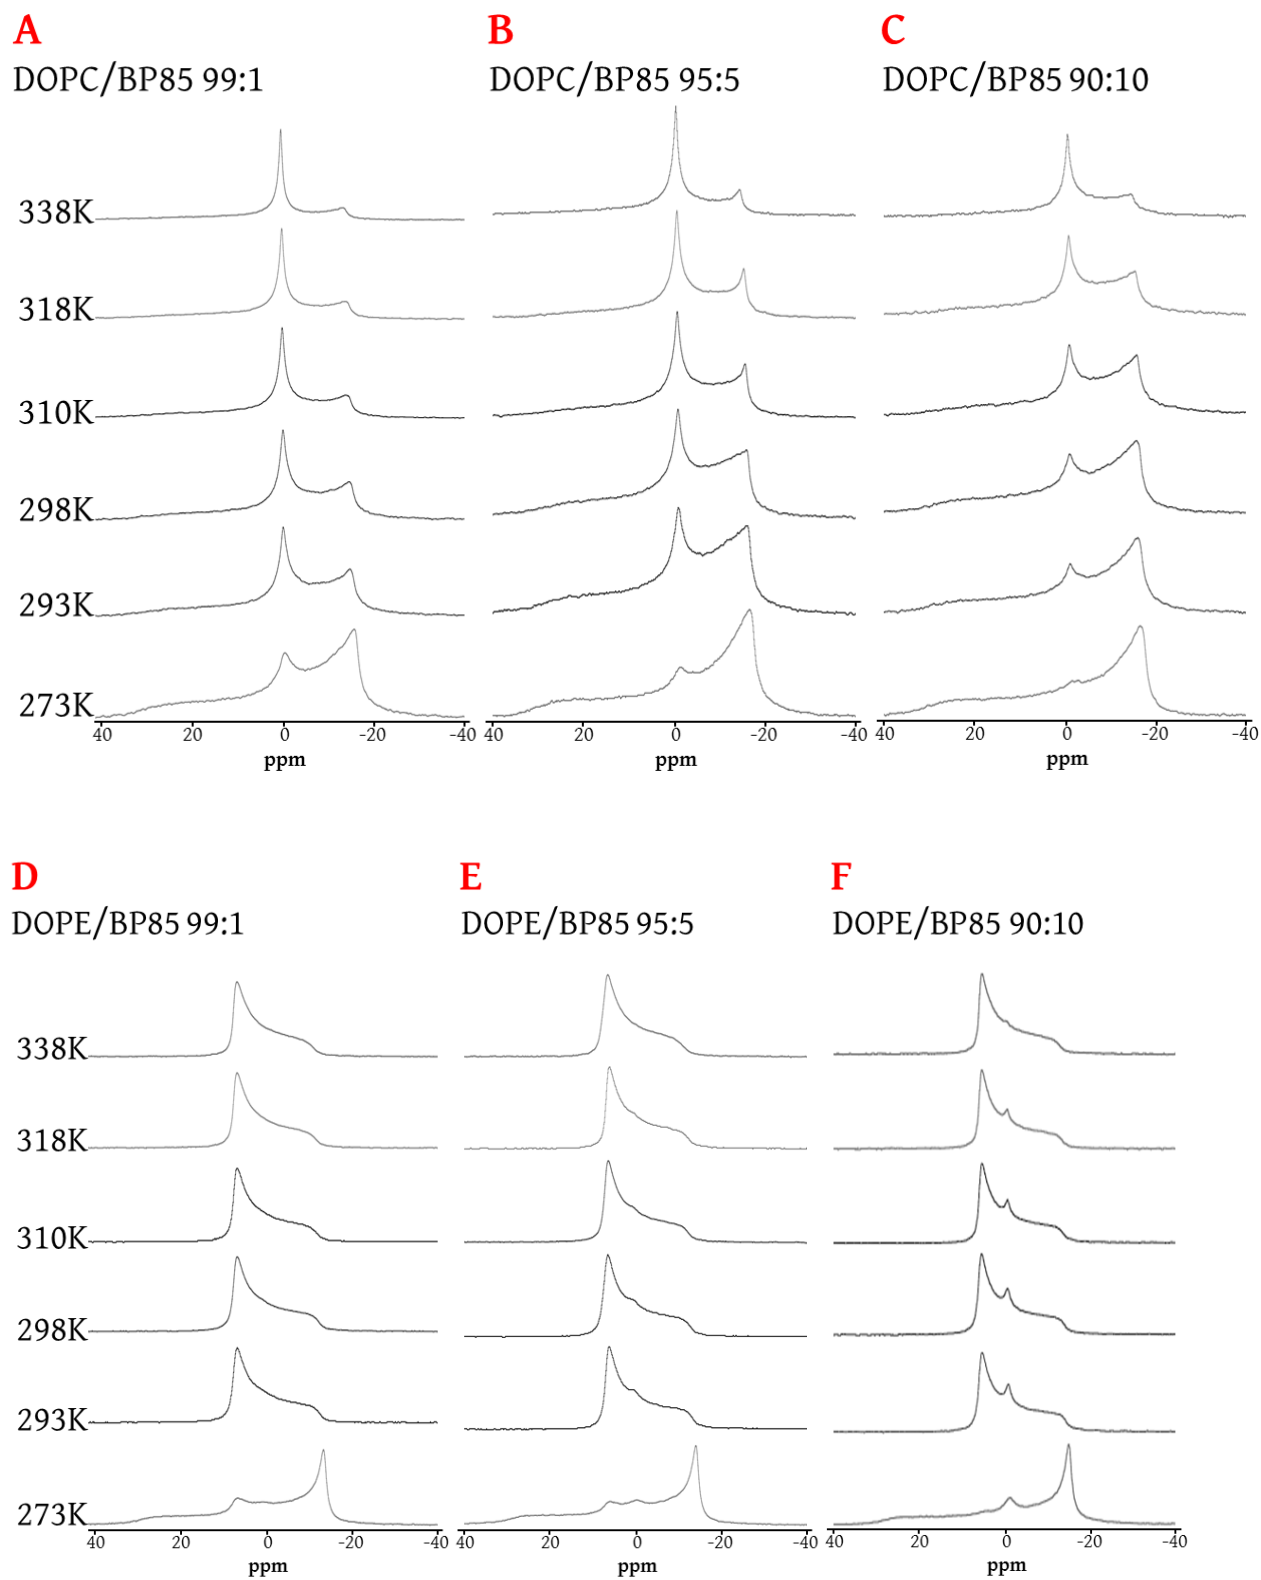

Fig. S6. Wide line  $^{31}\text{P}$  NMR temperature scans of DOPC (Panels A-C) and DOPE (panels D-F) doped with compound **2** (BP085; 1-10%).

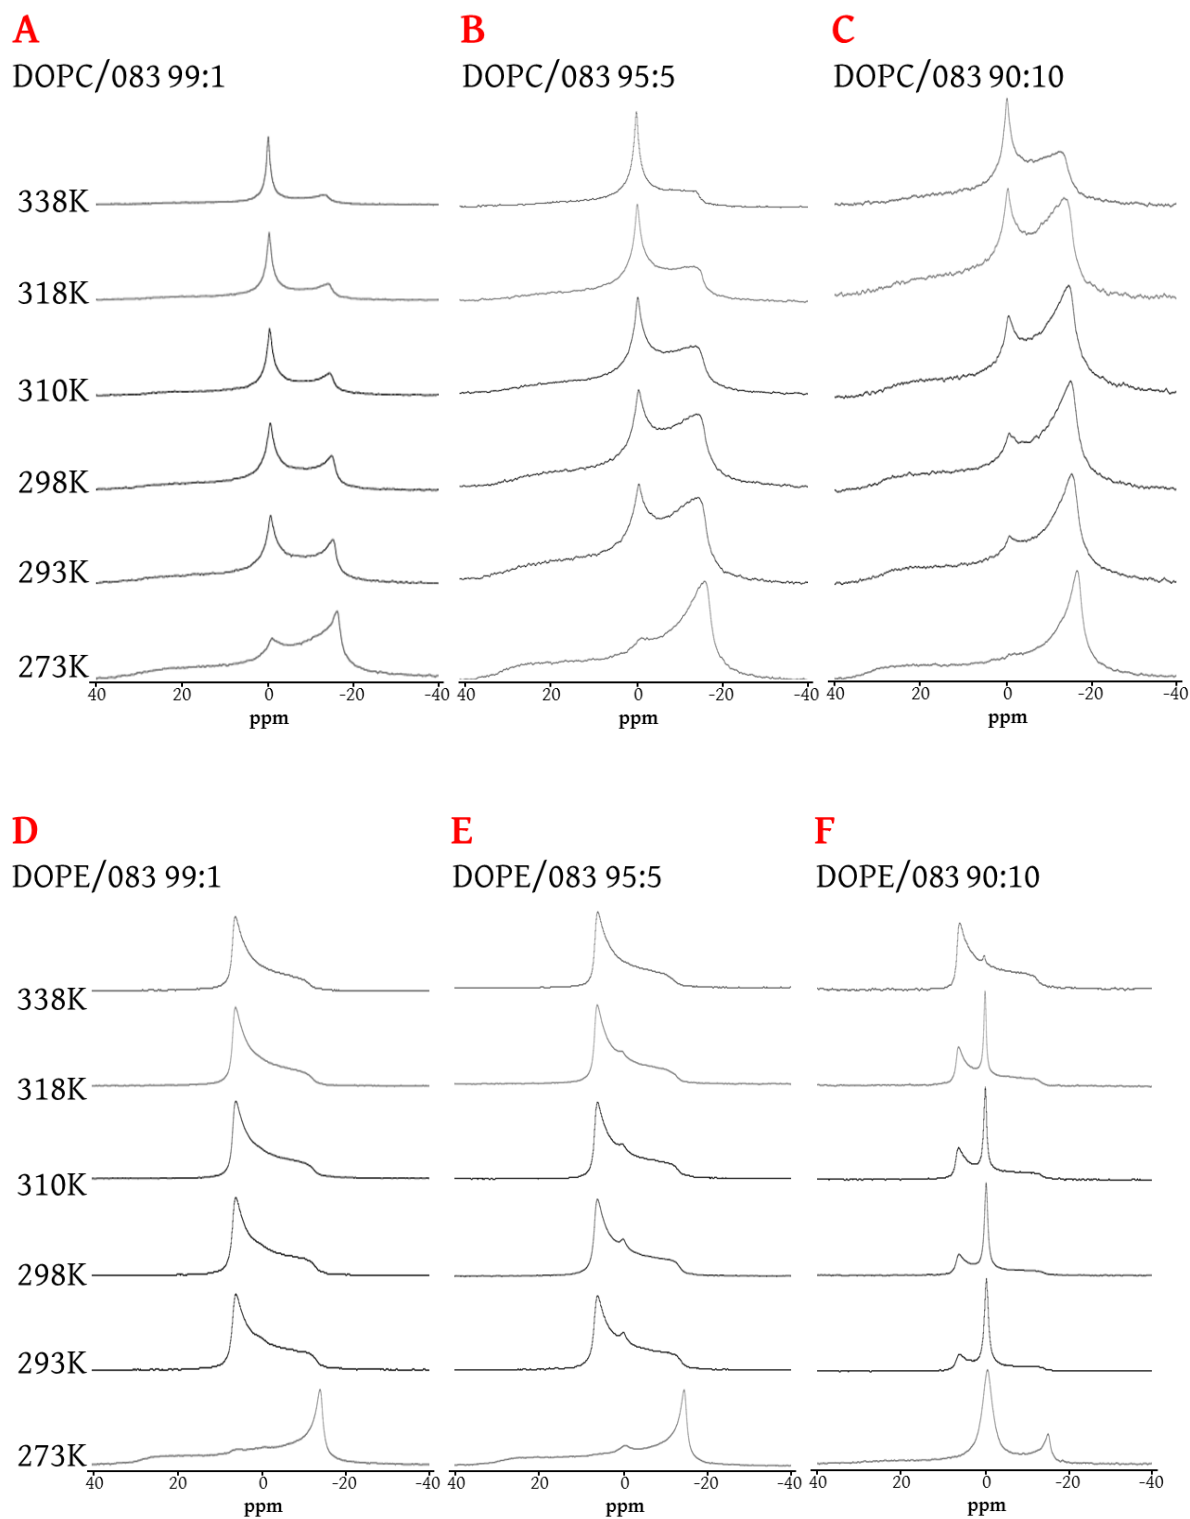

Fig. S7. Wide line  $^{31}\text{P}$  NMR temperature scans of DOPC (Panels A-C) and DOPE (panels D-F) doped with compound **3** (083; 1-10%).



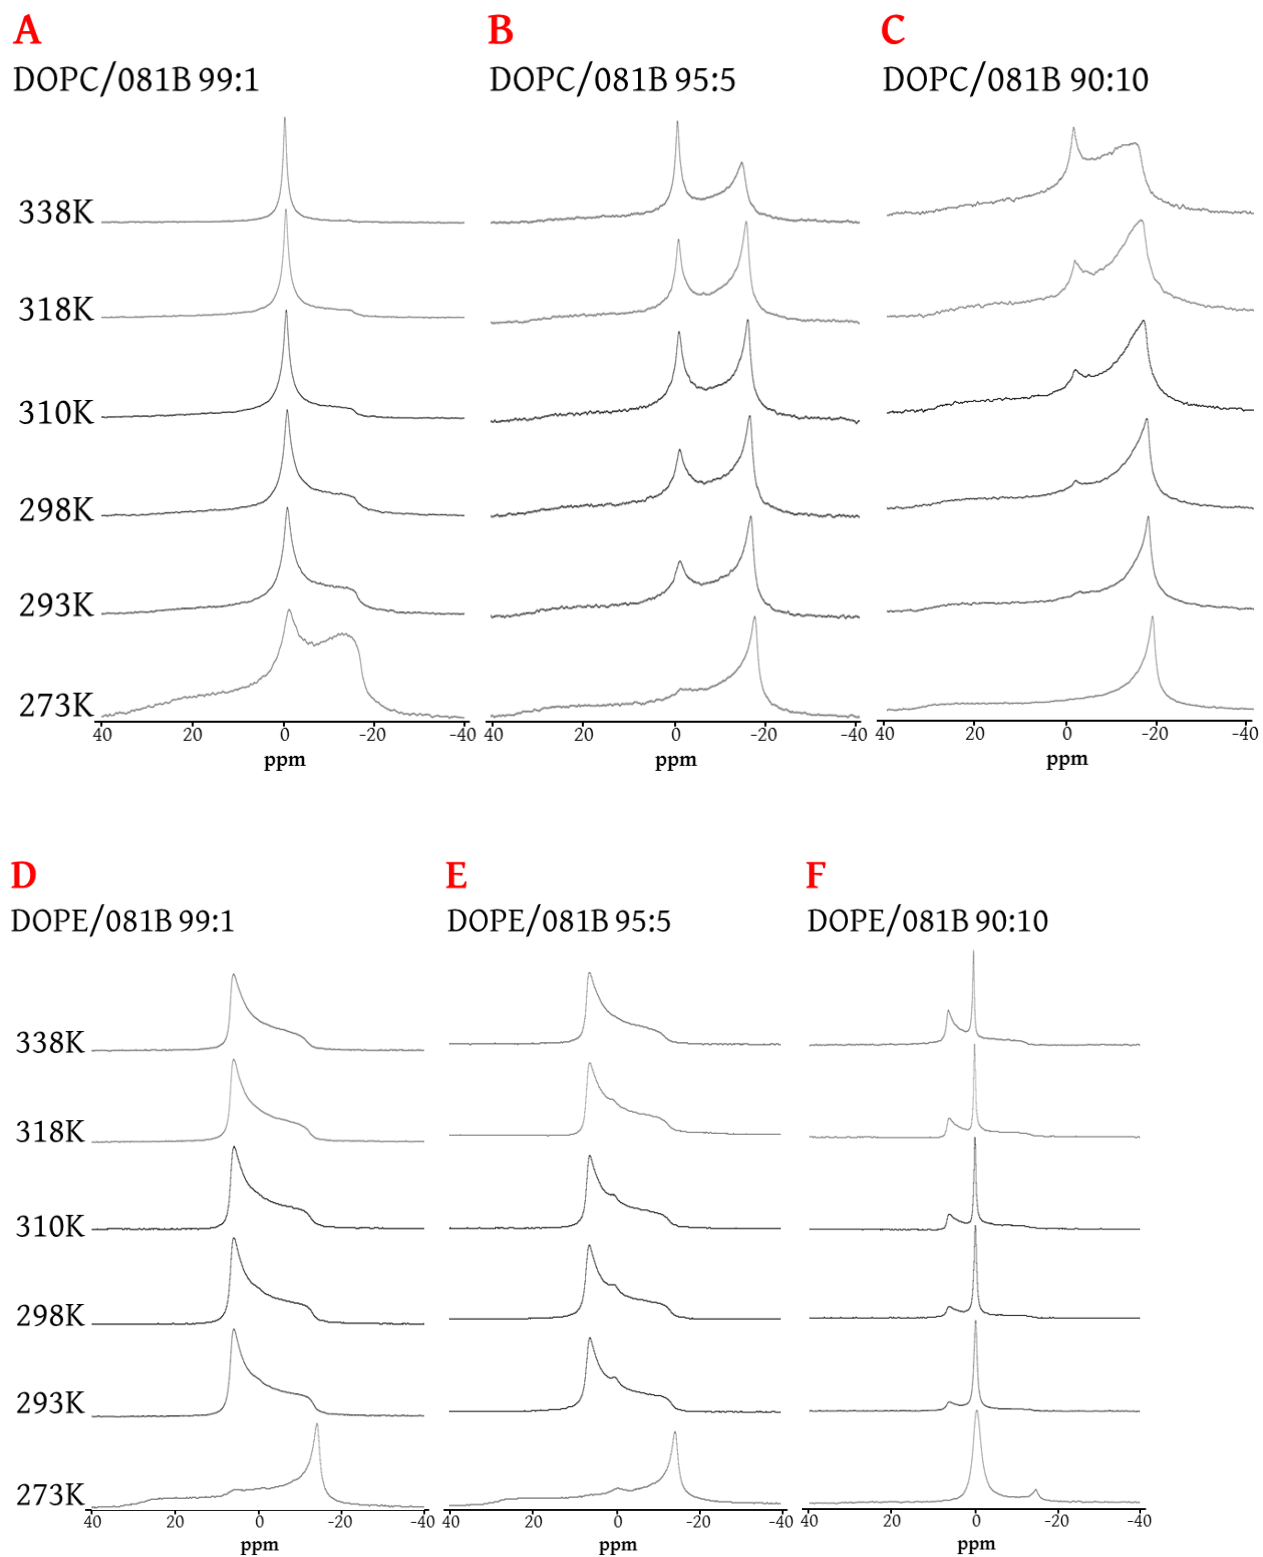

Fig. S8. Wide line  $^{31}\text{P}$  NMR temperature scans of DOPC (Panels A-C) and DOPE (panels D-F) doped with compound **4** (081B; 1-10%).

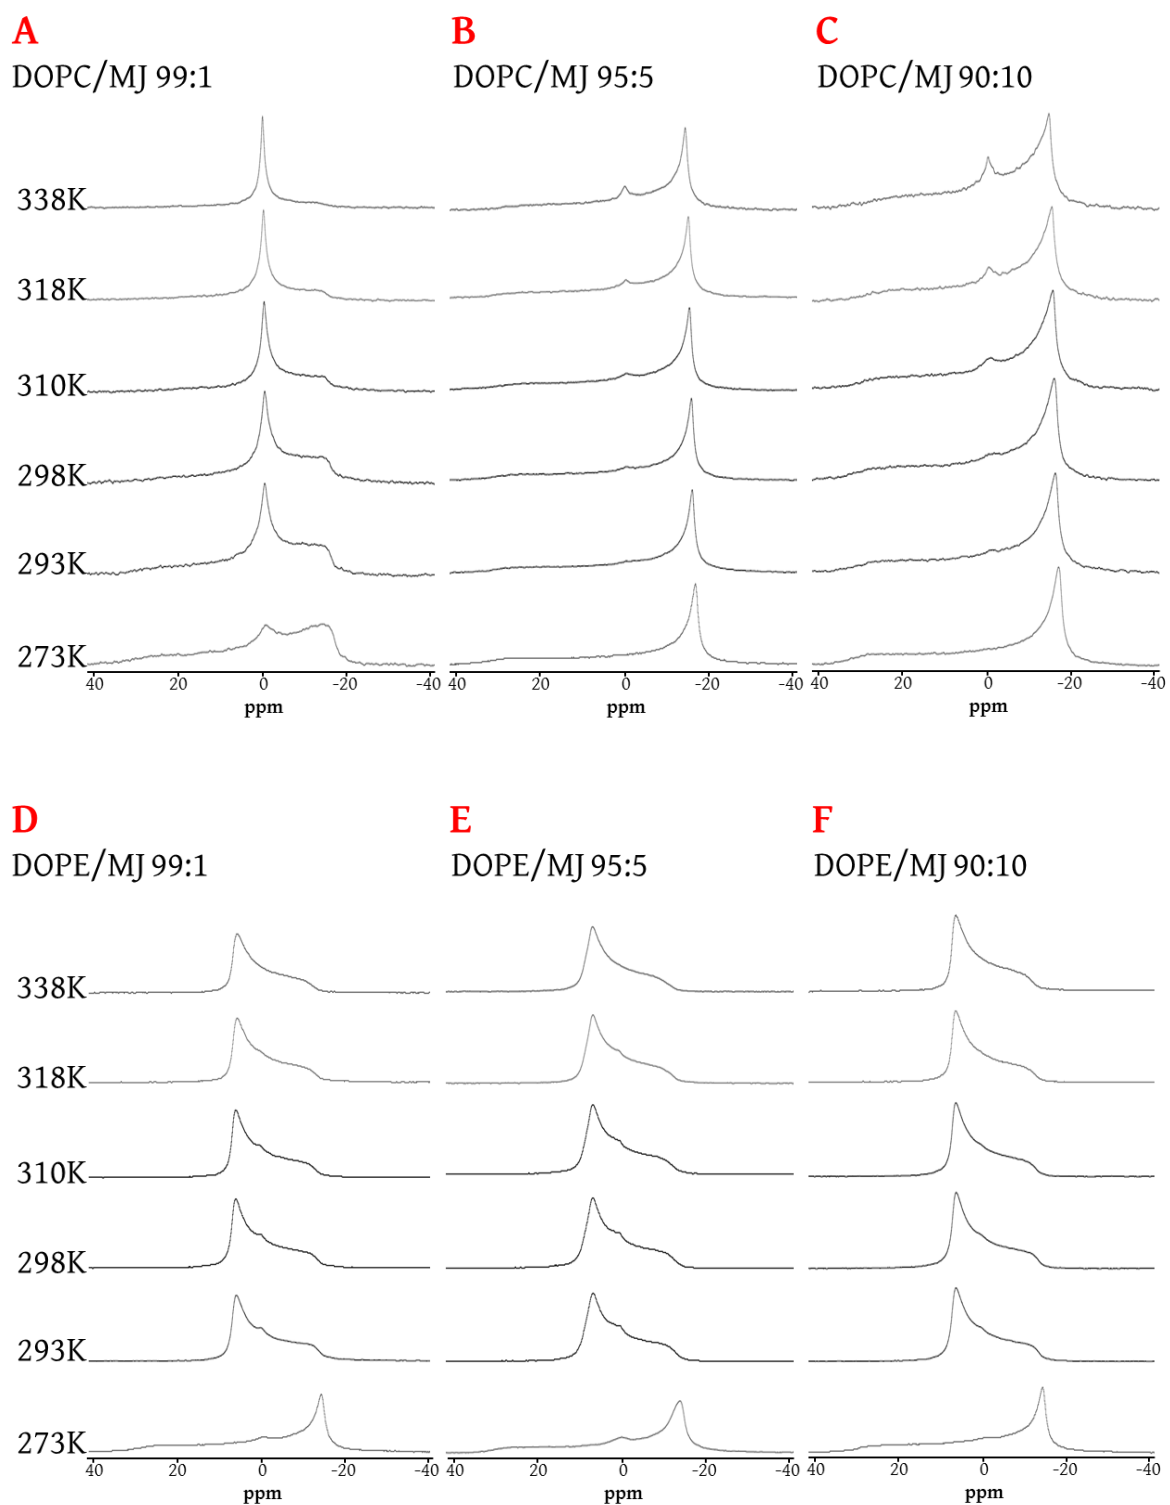

Fig. S9. Wide line  $^{31}\text{P}$  NMR temperature scans of DOPC (Panels A-C) and DOPE (panels D-F) doped with compound **5** (MJ; 1-10%).
